# Supplementary material
Source: PubMed Central journal article supplement (PMC5561743)
Supplement: NIHMS859519-supplement-Supplementary_materials.pdf [file NIHMS859519-supplement-Supplementary_materials.pdf]

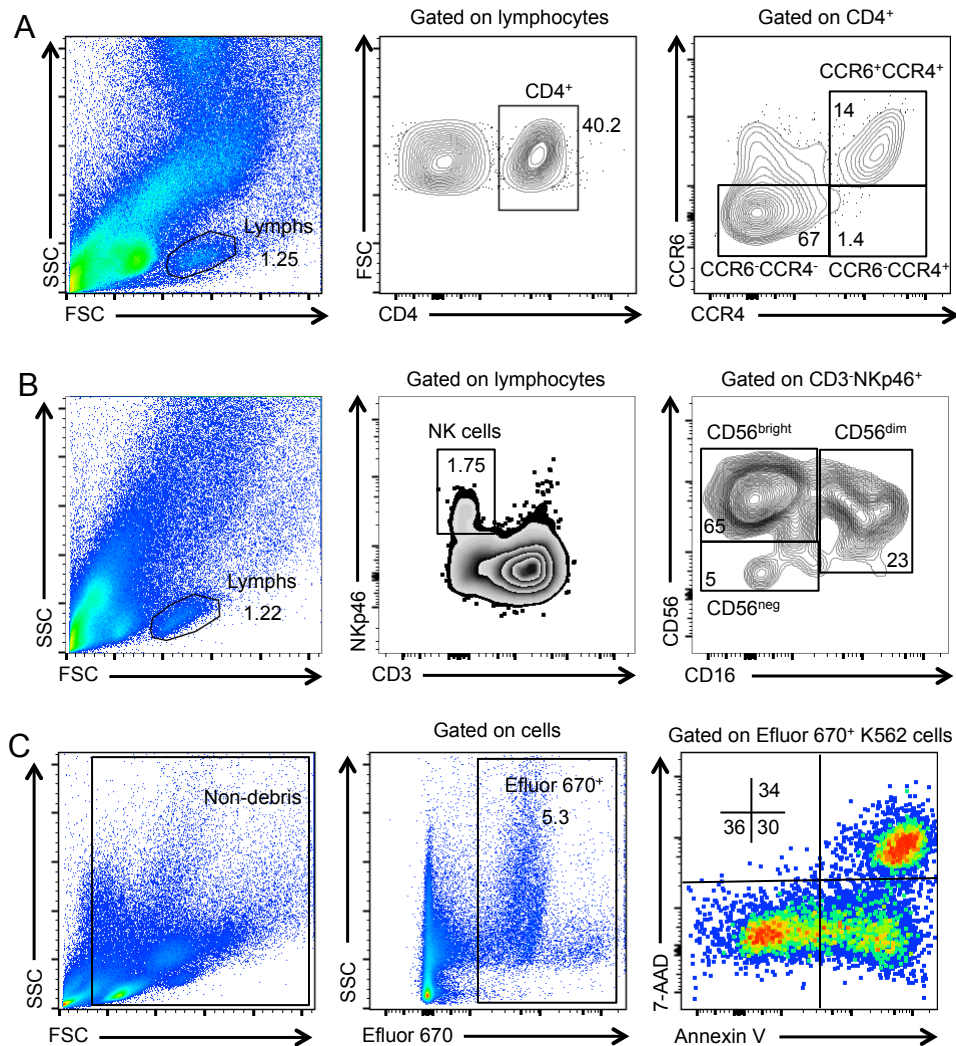

**Figure S1. Flow cytometry gating strategies**

(A) BAL CD4<sup>+</sup> T cells were identified as lymphocytes by FSC and SSC characteristics that expressed CD4. Surface expression of CCR6 and CCR4 was used to further define enriched helper T cell subclasses. (B) BAL NK cells were identified as lymphocytes by FSC and SSC characteristics that expressed NKp46 and lacked CD3 expression. Expression of CD56 and CD16 was used to further define NK cell subclasses. (C) PBMCs were incubated with target K562 cells (see Methods) and K562 lysis was assessed by identifying Efluor 670<sup>+</sup> cells and assessing Annexin V and 7-AAD staining. Numbers indicating % of targets cells in each quadrant. Representative flow cytometry plots from a severe asthma subject are shown and numbers indicate % of gated population.

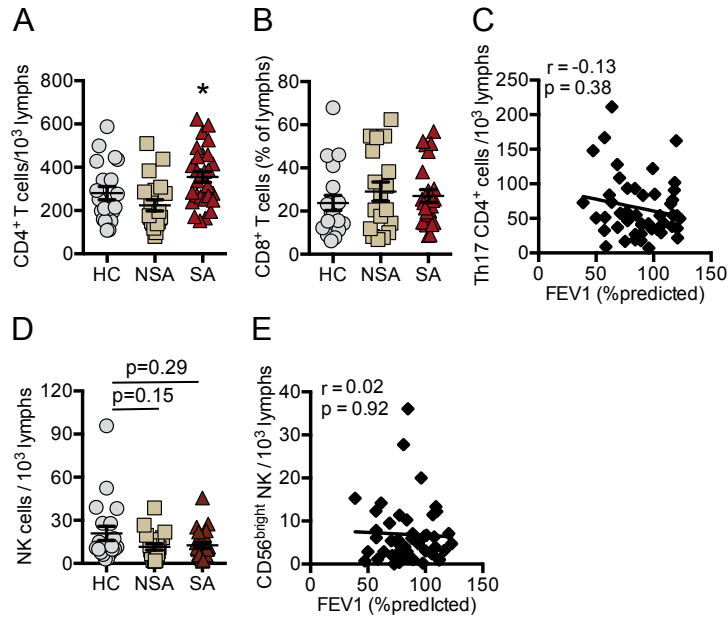

**Figure S2. BAL lymphocytes in healthy and asthma subjects**

BAL was obtained from healthy control (HC), non-severe asthma (NSA), and severe asthma (SA) subjects at baseline. **(A)** CD4<sup>+</sup> T cells were enumerated in BAL as number of cells per 10<sup>3</sup> lymphocytes. **(B)** CD8<sup>+</sup> T cells were enumerated as % of total lymphocytes. **(C)** The relationship between BAL Th17 CD4<sup>+</sup> T cells and lung function (% predicted FEV<sub>1</sub>) was determined in asthma (diamonds) and Spearman correlation r-value and significance are noted. **(D)** NK cells were quantified as number of CD3<sup>-</sup>NKp46<sup>+</sup> cells per 10<sup>3</sup> lymphocytes and **(E)** the relationship between CD56<sup>bright</sup> NK cells and lung function (% predicted FEV<sub>1</sub>) was determined in asthma (diamonds) and Spearman correlation r-value and significance are noted. Scatter plots show individual subject data points with overlying mean  $\pm$  SEM. \*p<0.05 compared with NSA by Kruskal-Wallis test and post hoc Dunn's multiple comparisons test.

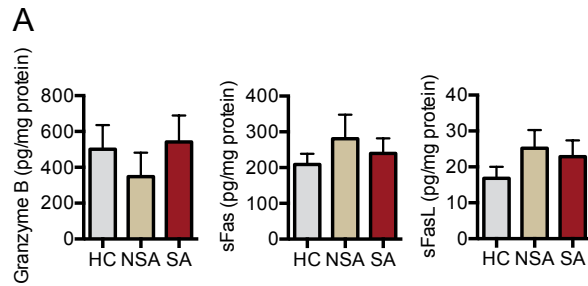

**Figure S3. Levels of additional cytotoxic mediators in BALF from healthy and asthma subjects**

BALF was obtained from healthy control (HC), non-severe asthma (NSA), and severe asthma (SA) subjects at baseline. **(A)** Cytotoxic mediators were measured in cell-free BALF by cytokine bead array and normalized to protein (see Methods). Values represent mean  $\pm$  SEM. Analyzed by Kruskal-Wallis test.

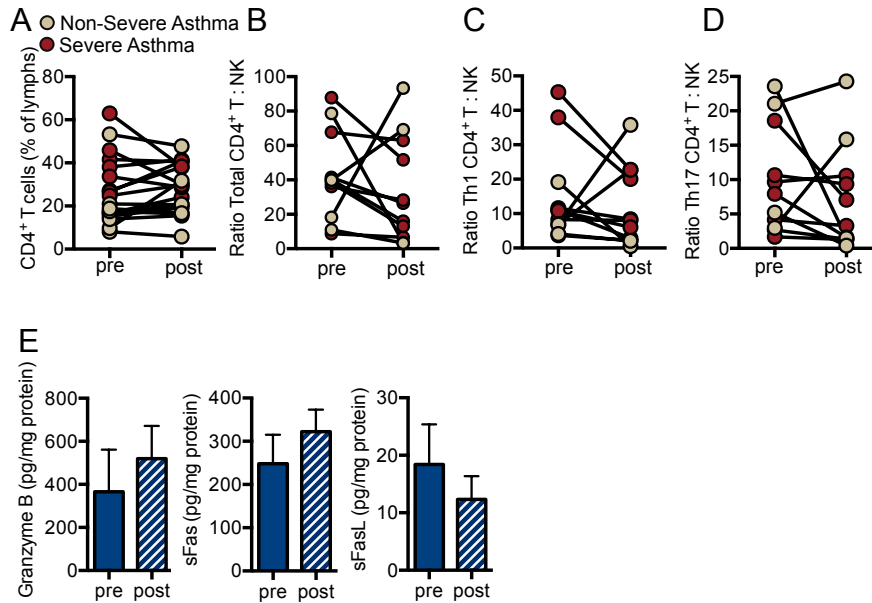

**Figure S4. Systemic triamcinolone does not alter BAL CD4<sup>+</sup> T cell number or the ratio of effector CD4<sup>+</sup> T cells to NK cells in asthma**

BAL was performed in asthma subjects at baseline and 3 to 6 weeks after intramuscular triamcinolone. **(A)** BAL CD4<sup>+</sup> T cell number (% of lymphocytes), **(B)** ratio total CD4<sup>+</sup> T cells: NK cells, **(C)** ratio Th1-enriched CD4<sup>+</sup> T cells: NK cells, and **(D)** ratio Th17-enriched CD4<sup>+</sup> T cells: NK cells were compared pre- and post-triamcinolone in NSA (tan) and SA (red) subjects (n=11-18 subjects). **(E)** Cytotoxic mediators were measured in cell-free BALF pre- and post-triamcinolone by cytokine bead array in n=18 asthmatic subjects. Analyzed by Wilcoxon matched-pairs signed rank test.

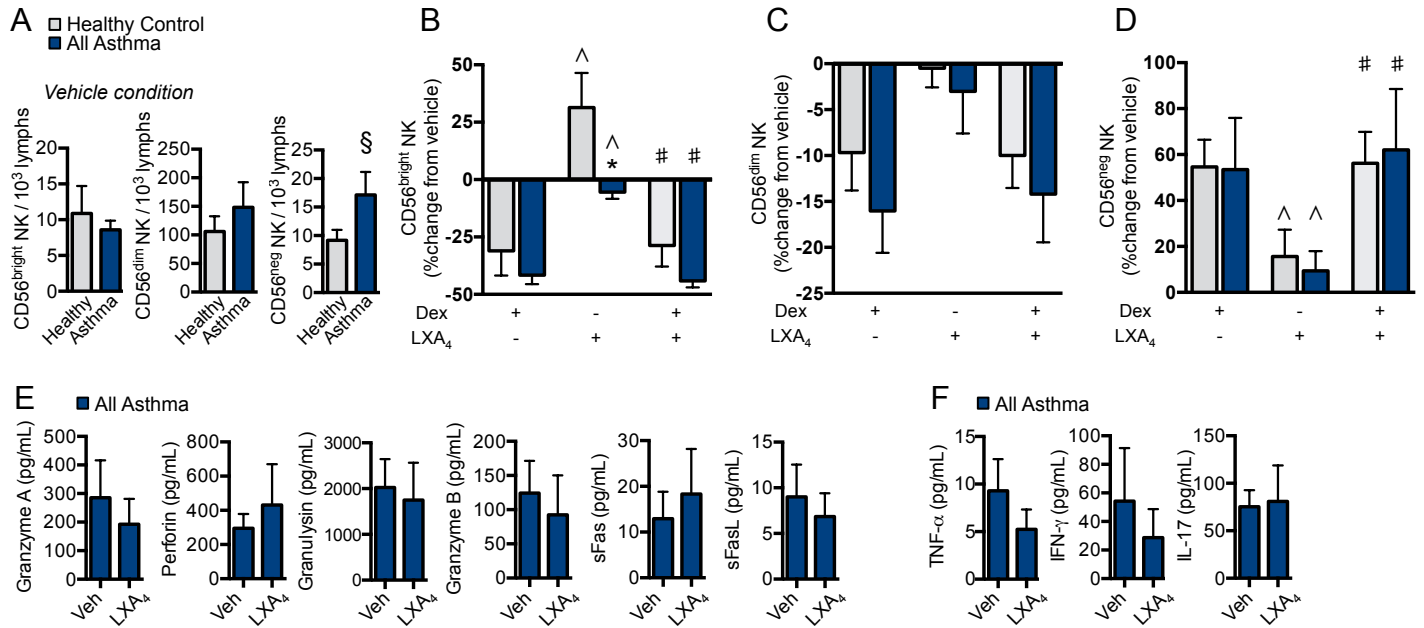

**Figure S5. Exposure to dexamethasone or LXA<sub>4</sub> changes peripheral blood NK cell phenotype and LXA<sub>4</sub> exposure does not impair NK cell release of cytotoxic mediators**

PBMCs from healthy donors (grey bars, n=6) or asthma subjects (blue bars, n=6) were exposed to vehicle, dexamethasone (Dex) 1 $\mu$ M, lipoxin A<sub>4</sub> (LXA<sub>4</sub>) 50nM or Dex and LXA<sub>4</sub> for 48 hours. NK cells were identified by flow cytometry as CD3<sup>-</sup>NKp46<sup>+</sup> cells with lymphoid morphology and NK cell phenotype was determined by expression of CD56 and CD16 as in Figure 2. **(A)** The numbers of each NK cell subset were determined in the vehicle condition. Changes in the numbers of **(B)** CD56<sup>bright</sup>, **(C)** CD56<sup>dim</sup>, and **(D)** CD56<sup>neg</sup> NK cells after exposure to each experimental condition for 48 hours was determined as % change relative to vehicle. **(E)** Cytotoxic mediators and **(F)** cytokines were measured in cell-free supernatant from co-culture experiments with paired comparisons made between Veh and LXA<sub>4</sub> conditions in n=5 asthma subjects. Values represent mean  $\pm$  SEM. \*p<0.05 and §p<0.10 compared with health, ^p<0.05 compared with Dex, and #p<0.05 compared with LXA<sub>4</sub> by ANOVA with Holm-Sidak's correction for multiple comparisons.

**Supplemental Table 1.** Subject number (n) for each experiment

|                               | <b>Healthy (n)</b> | <b>Non-severe Asthma (n)</b> | <b>Severe Asthma (n)</b> |
|-------------------------------|--------------------|------------------------------|--------------------------|
| <b>Figures 1 and S2</b>       |                    |                              |                          |
| CD4 panels                    | 20                 | 21                           | 28                       |
| NK panels                     | 20                 | 20                           | 25                       |
| CD8 panel                     | 20                 | 18                           | 24                       |
| Ratio CD4/NK                  | 19                 | 19                           | 25                       |
| Ratio PMN/NK                  | 19                 | 19                           | 24                       |
| <b>Figure 2 and S3</b>        |                    |                              |                          |
| NK panels                     | 20                 | 20                           | 25                       |
| Mediator analysis             | 21                 | 23                           | 29                       |
| <b>Figure 3 and S4</b>        |                    |                              |                          |
| Pre-post NK panels            | n/a                | 4                            | 7                        |
| Pre-post PMN panel            | n/a                | 7                            | 10                       |
| Pre-post mediator analysis    | n/a                | 7                            | 11                       |
| Pre-post CD4 panels           | n/a                | 8                            | 10                       |
| Pre-post CD4: NK ratio panels | n/a                | 4                            | 7                        |
| <b>Figure 4</b>               |                    |                              |                          |
| NK panels                     | 20                 | 20                           | 25                       |
| CD4 panels                    | 20                 | 21                           | 28                       |
| PMN panel                     | 20                 | 22                           | 27                       |
